# Supplementary material for: A dual-mode turn-on fluorescent BODIPY-based probe for visualization of mercury ions in living cells
Source: Royal Society of Chemistry journal article supplement (doi:10.1039/c6an00371k), 2016-01-01
Supplement: c6an00371k1.pdf [file c6an00371k1.pdf]

## Supporting Information

### **A dual-mode turn-on fluorescent BODIPY-based probe for visualization of mercury ion in living cells**

Yue Wang,<sup>a</sup> Fuchao Pan,<sup>a</sup> Yuanlin Zhang,<sup>a</sup> Fangfang Peng,<sup>a</sup> Zhentao Huang,<sup>a</sup> Weijuan Zhang<sup>\*,a</sup> and Weili Zhao<sup>\*,a,b</sup>

*<sup>a</sup>Key Laboratory for Special Functional Materials of the Ministry of Education, Henan University, Kaifeng, 475004, P. R. China. E-mail: zwjuan1965@henu.edu.cn; zhaow@henu.edu.cn. Tel/Fax: +86-371-23881358.*

*<sup>b</sup>School of Pharmacy, Fudan University, Shanghai, 201203, P. R. China. E-mail: zhaoweili@fudan.edu.cn. Tel/Fax: +86-21-51980111.*

#### **Content**

|                                                      |             |
|------------------------------------------------------|-------------|
| <b>1. Additional Absorption and Emission Spectra</b> | <b>S2-6</b> |
| <b>2. NMR Spectra</b>                                | <b>S7-9</b> |

## 1. Additional Absorption and Emission Spectra

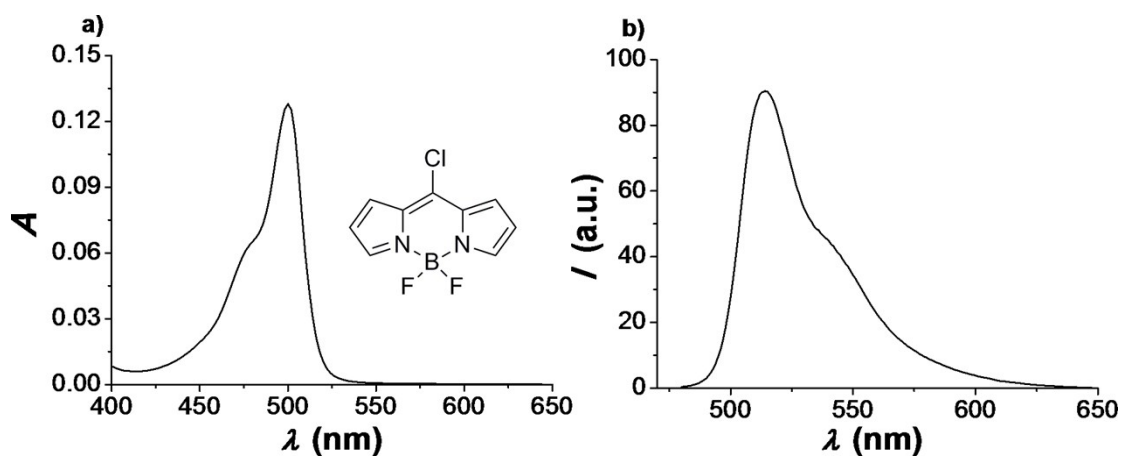

**Figure S1.** Absorption (a) and emission spectra (b,  $\lambda_{\text{ex}} = 470$  nm) of 8-chloro-BODIPY in PBS buffer solutions (pH = 7.4, containing 0.5% DMSO) at 25 °C.

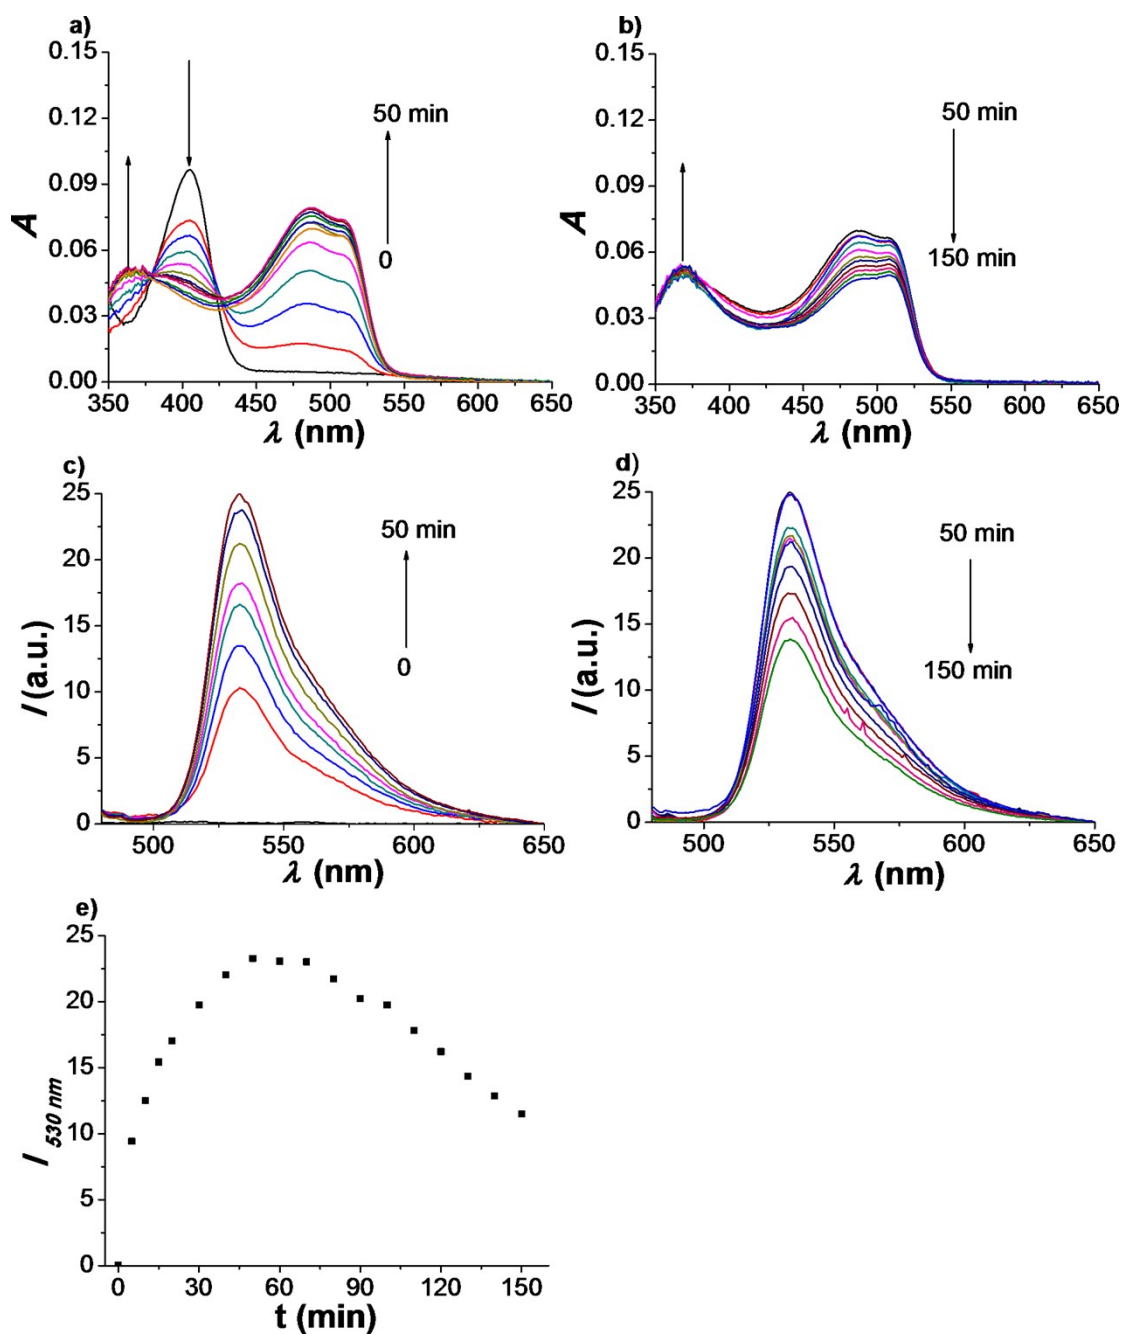

**Figure S2.** The time-dependent profile of probe **1** (5  $\mu\text{M}$ ) in PBS buffer solutions (pH = 7.4, containing 0.5% DMSO) responded to  $\text{Hg}^{2+}$  (10  $\mu\text{M}$ ) after the specified time periods (0-150 min) for absorption **(a)** at 0, 5, 10, 15, 20, 30, 40 and 50 min, **(b)** at 50, 60, 70, 80, 90, 100, 110, 120, 130, 140 and 150 min, and for fluorescence emission **(c)** at 0, 5, 10, 15, 20, 30, 40 and 50 min, as well as **(d)** at 50, 60, 70, 80, 90, 100, 110, 120, 130, 140 and 150 min ( $\lambda_{\text{ex}} = 470 \text{ nm}$ ). **(e)** The time-dependent emission intensities ( $\lambda_{\text{em}} = 530 \text{ nm}$ ,  $\lambda_{\text{ex}} = 470 \text{ nm}$ ).

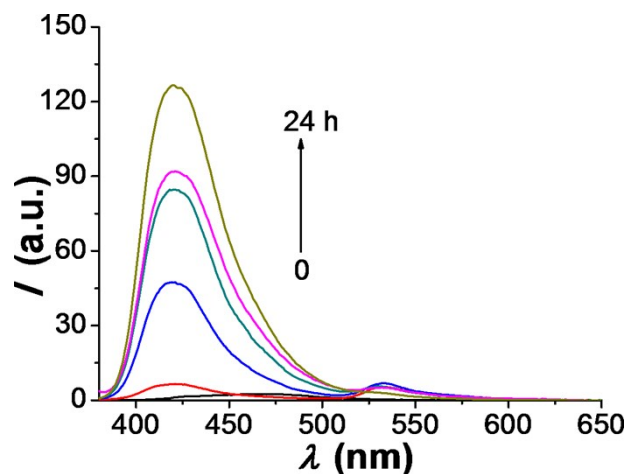

**Figure S3.** Fluorescence emission time profile of probe **1** (5  $\mu\text{M}$ ,  $\lambda_{\text{ex}} = 370$  nm) in PBS buffer solutions (pH = 7.4, containing 0.5% DMSO) with  $\text{Hg}^{2+}$  (10  $\mu\text{M}$ ) after the specified time periods (0, 10 min, 50 min, 3 h, 6 h, and 24 h, respectively).

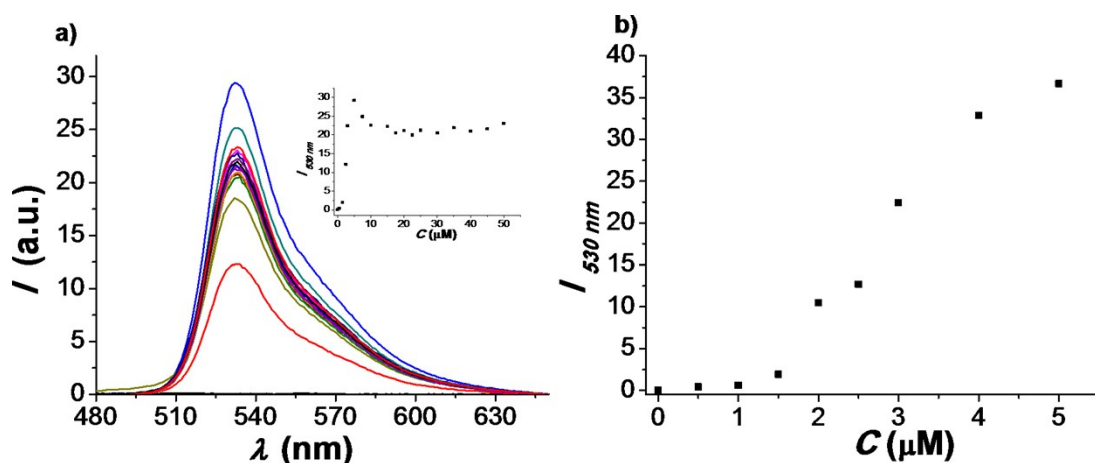

**Figure S4.** (a) Fluorescence spectra ( $\lambda_{\text{ex}} = 470$  nm) of probe **1** (5  $\mu\text{M}$ ) in the presence of increasing concentrations of  $\text{HgCl}_2$  (0-50  $\mu\text{M}$ ) in PBS buffer solutions (pH = 7.4, 0.5% DMSO). Inset: plot between the fluorescent intensity of probe **1** to increased concentration. (b) Enlarged plot between the fluorescent intensity of probe **1** to increased concentration in the range of 0-5  $\mu\text{M}$  after incubation for 150 min ( $\lambda_{\text{em}} = 530$  nm).

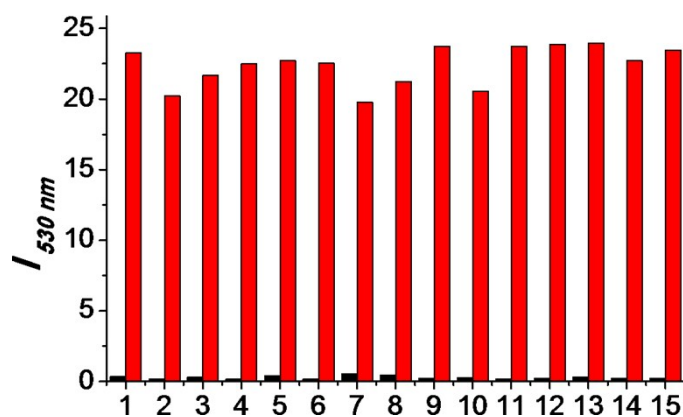

**Figure S5.** Selectivity of probe **1** (5  $\mu\text{M}$ ) toward  $\text{Hg}^{2+}$  ion (10  $\mu\text{M}$ ) and other various metal ions (100  $\mu\text{M}$ ) in PBS buffer solutions (pH = 7.4, containing 0.5% DMSO) for 150 min monitored at 530 nm ( $\lambda_{\text{ex}}$  = 470 nm). Black bar represents the fluorescence intensity of only a single analyte with probe **1**; Red bar represents the fluorescence intensity of mixture of analyte and  $\text{HgCl}_2$  with probe **1**. (1) blank, (2)  $\text{Ag}^+$ , (3)  $\text{Al}^{3+}$ , (4)  $\text{Ca}^{2+}$ , (5)  $\text{Cd}^{2+}$ , (6)  $\text{Co}^{2+}$ , (7)  $\text{Cu}^{2+}$ , (8)  $\text{Fe}^{3+}$ , (9)  $\text{K}^+$ , (10)  $\text{Mg}^{2+}$ , (11)  $\text{Na}^+$ , (12)  $\text{Ni}^{2+}$ , (13)  $\text{Pb}^{2+}$ , (14)  $\text{Zn}^{2+}$ , (15)  $\text{Sn}^{2+}$ .

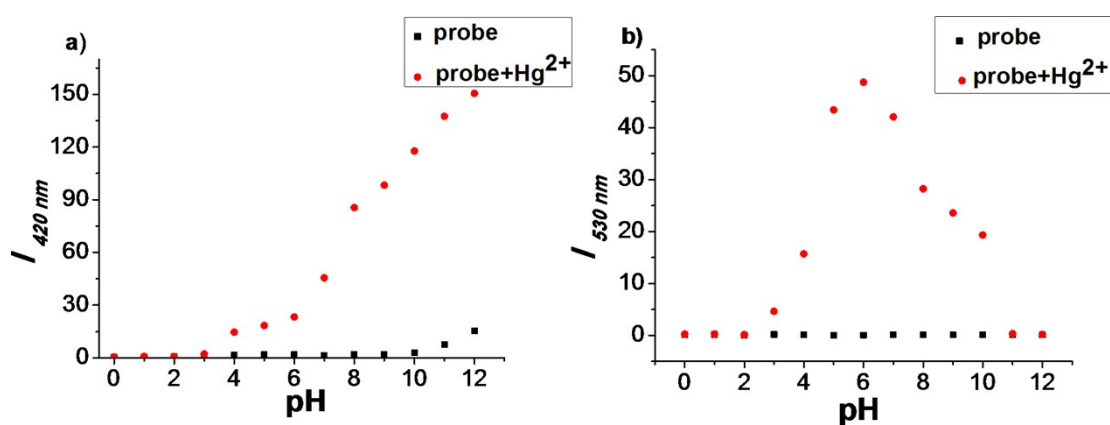

**Figure S6.** Fluorescence intensity profiles of probe **1** (5  $\mu\text{M}$ ) prior to and after addition of  $\text{HgCl}_2$  (10  $\mu\text{M}$ ) at various pH values for 150 min incubation. (a) Monitored at 420 nm ( $\lambda_{\text{ex}}$  = 370 nm); (b) Monitored at 530 nm ( $\lambda_{\text{ex}}$  = 470 nm).

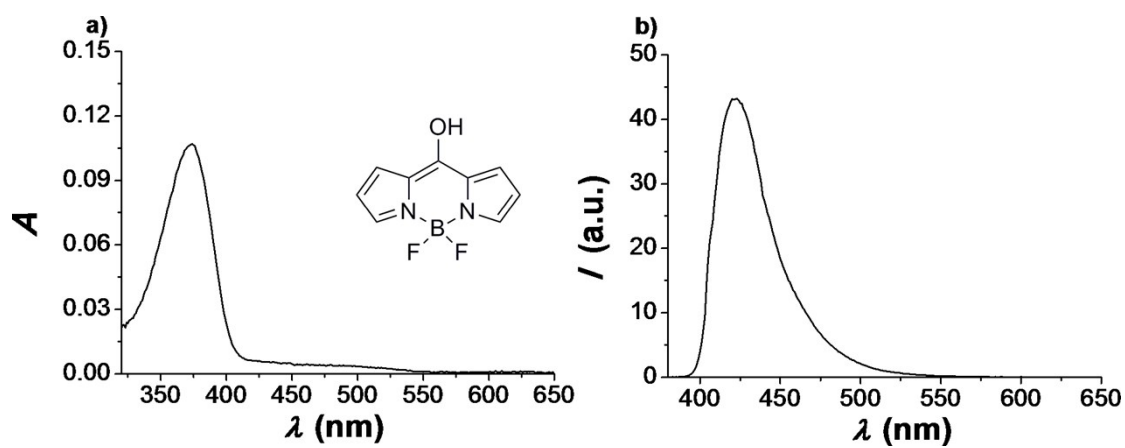

**Figure S7.** Absorption (a) and emission spectra (b,  $\lambda_{\text{ex}} = 370$  nm) of 8-hydroxy-BODIPY measured in PBS buffer solutions (pH = 7.4, containing 0.5% DMSO) at 25 °C.

## 2. NMR Spectra

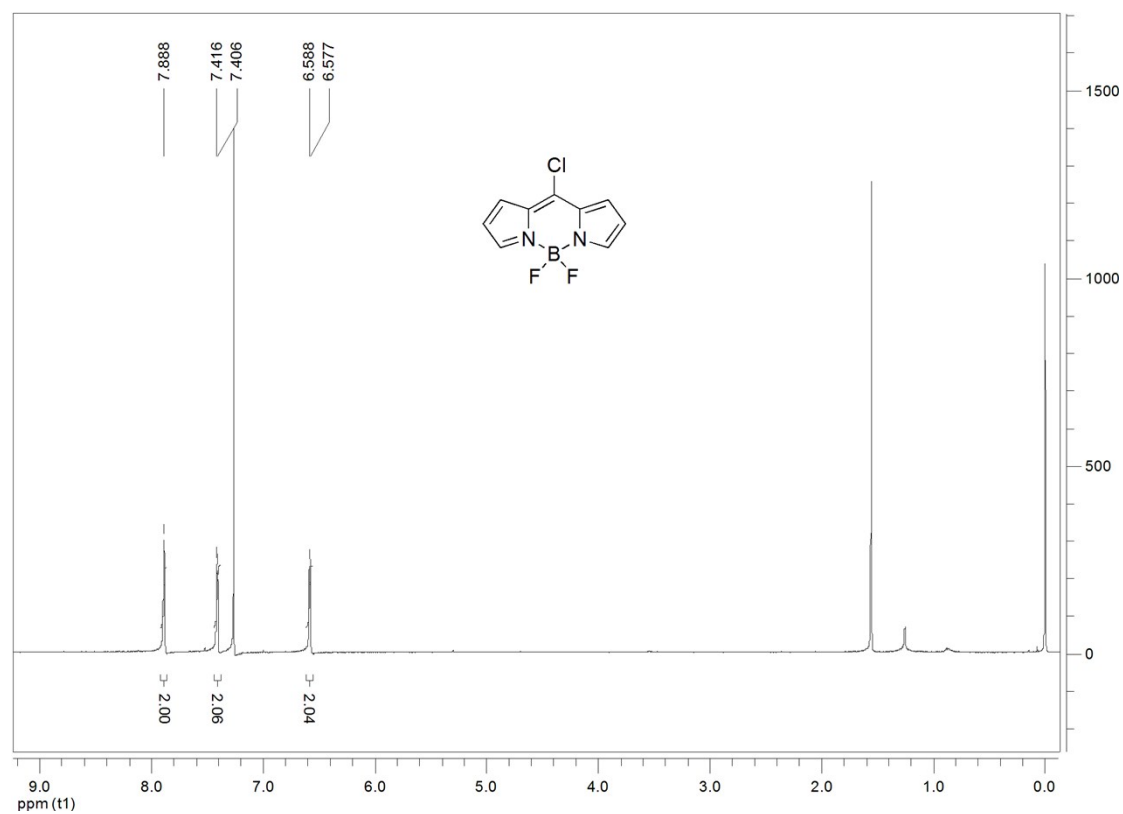

**Figure S8.** <sup>1</sup>H NMR spectra of 8-chloro-BODIPY in CDCl<sub>3</sub>.

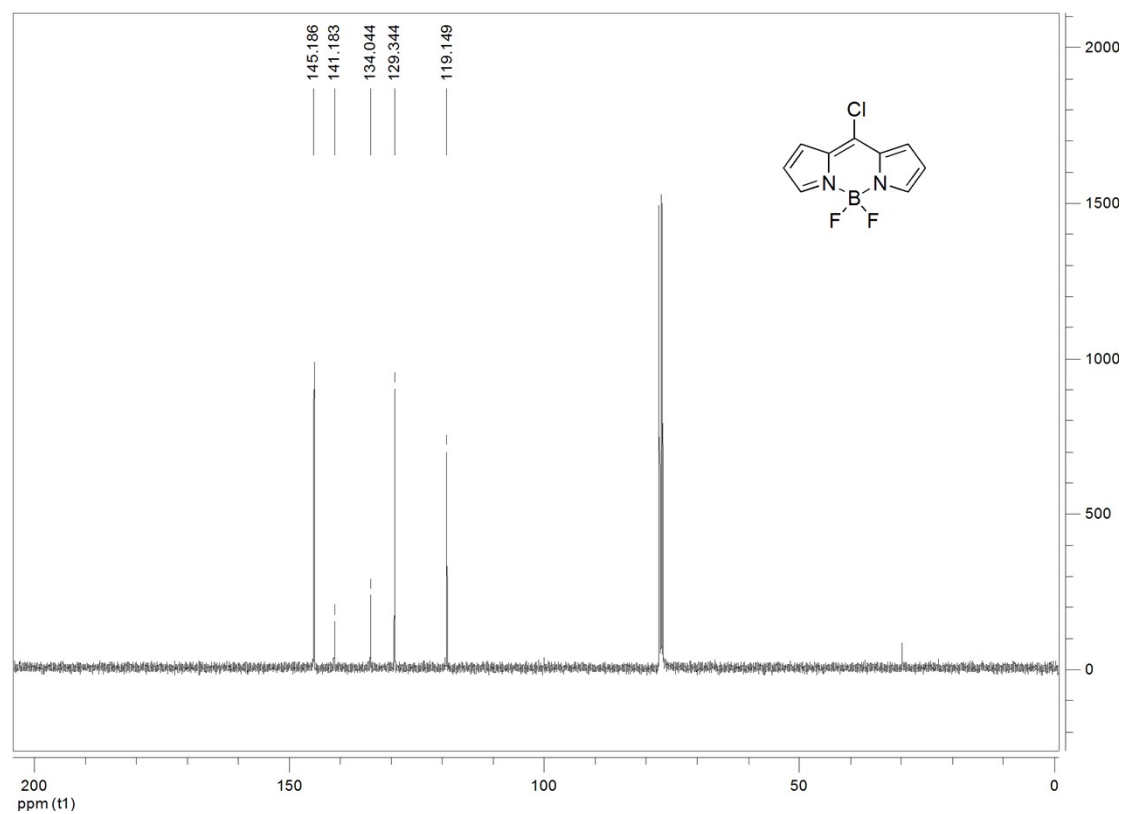

**Figure S9.** <sup>13</sup>C NMR spectra of 8-chloro-BODIPY in CDCl<sub>3</sub>.

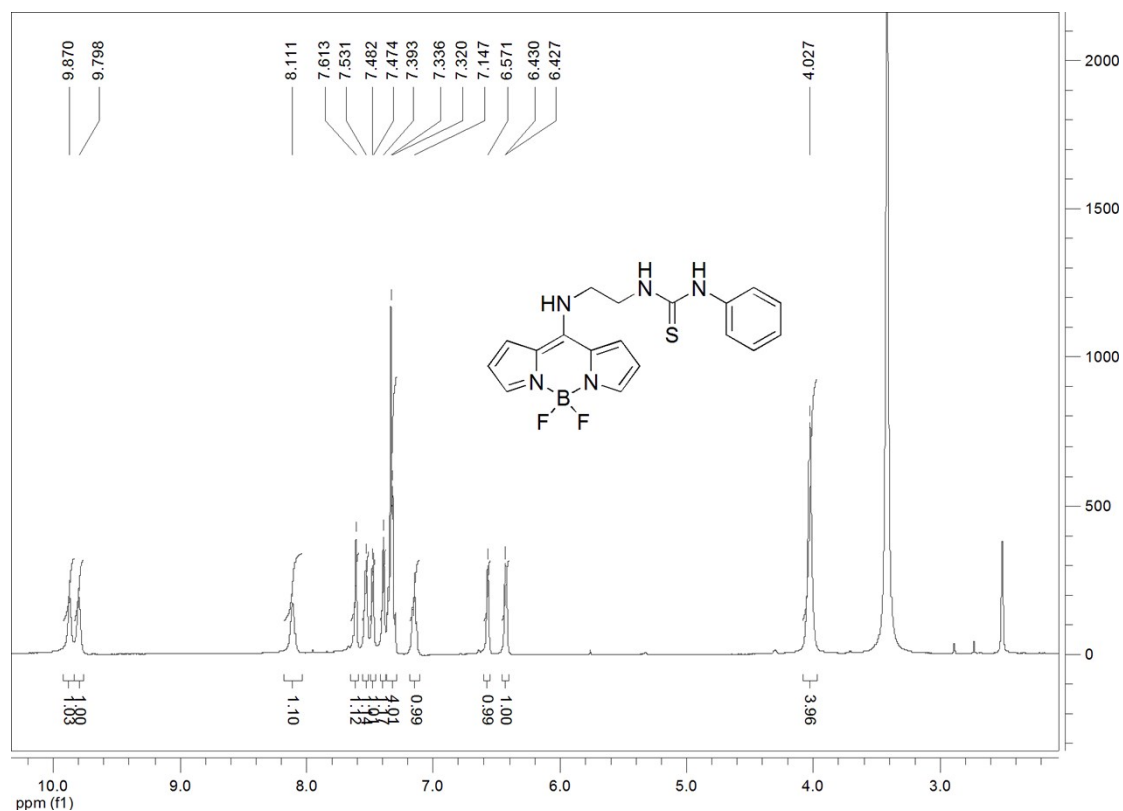

**Figure S10.** <sup>1</sup>H NMR spectra of **1** in DMSO.

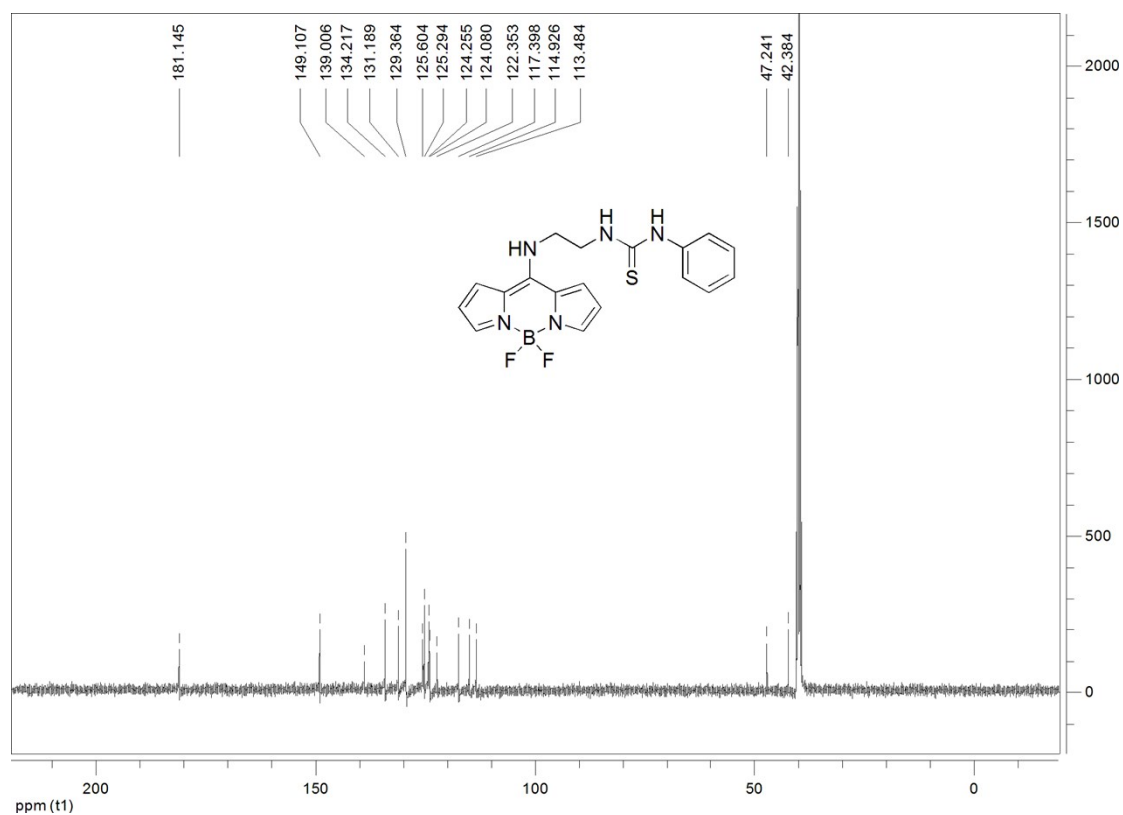

**Figure S11.** <sup>13</sup>C NMR spectra of **1** in DMSO.



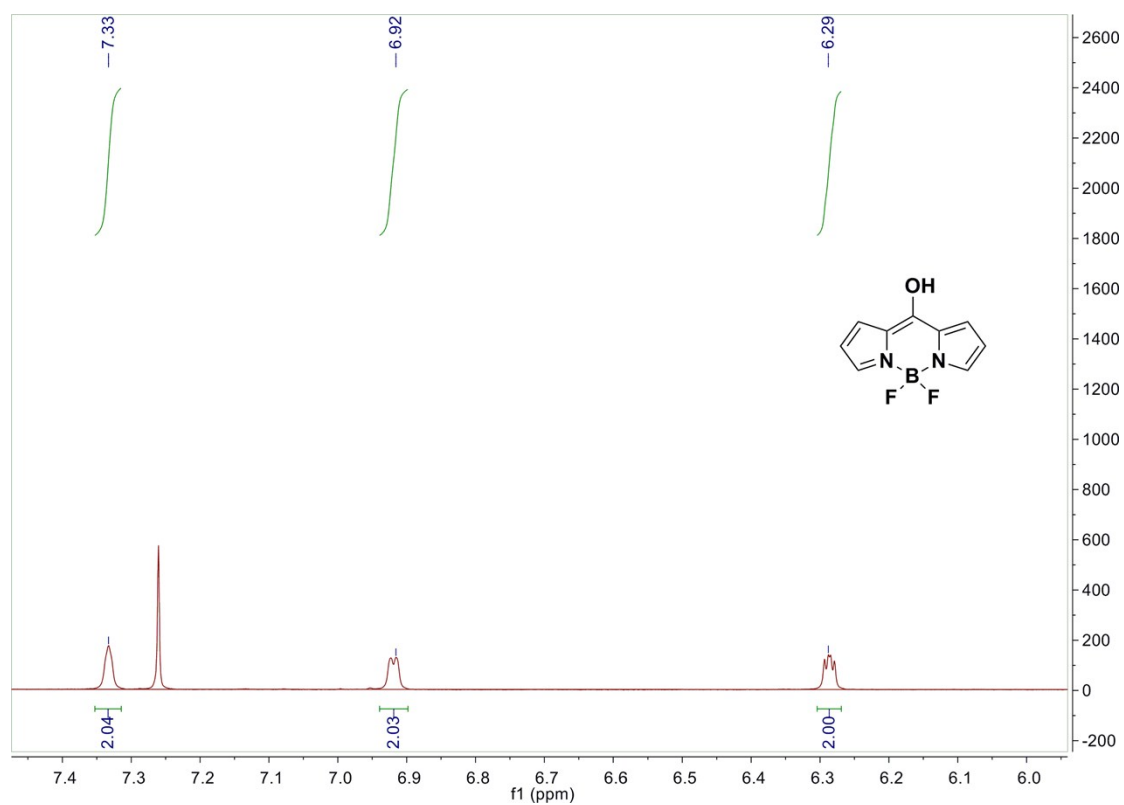

**Figure S12.**  $^1\text{H}$  NMR spectra of 8-hydroxy-BODIPY in  $\text{CDCl}_3$ .
